# Supplementary material
Source: PubMed Central journal article supplement (PMC1905843)
Supplement: NIHMS21441-supplement-01.pdf [file NIHMS21441-supplement-01.pdf]

## SUPPLEMENTARY INFORMATION

### Convenient synthesis and *in vitro* pharmacological activity of 2-thioanalogs of salvinorin A and B

Ruslan V. Bikbulatov<sup>a</sup>, Feng Yan<sup>b</sup>, Bryan L. Roth<sup>b</sup> and Jordan K. Zjawiony<sup>a,c,\*</sup>

<sup>a</sup>Department of Pharmacognosy, School of Pharmacy, University of Mississippi, University, MS 38677-1848, USA <sup>b</sup>Department of Pharmacology, School of Medicine and Division of Medicinal Chemistry and Natural Products, School of Pharmacy, NIMH Psychoactive Drug Screening Program, University of North Carolina, Chapel Hill, NC 27599, USA <sup>c</sup>National Center for Natural Products Research, Research Institute of Pharmaceutical Sciences, School of Pharmacy, University of Mississippi, University, MS 39677-1848, USA

#### List of Supporting Information:

- Figure S1.** <sup>1</sup>H NMR spectrum of compound **4** (400MHz, CDCl<sub>3</sub>)
- Figure S2.** <sup>13</sup>C NMR spectrum of compound **4** (100MHz, CDCl<sub>3</sub>)
- Figure S3.** <sup>1</sup>H NMR spectrum of compound **5** (400MHz, CD<sub>2</sub>Cl<sub>2</sub>)
- Figure S4.** <sup>13</sup>C NMR spectrum of compound **5** (125MHz, CDCl<sub>3</sub>)
- Figure S5.** <sup>1</sup>H NMR spectrum of compound **6** (400MHz, CDCl<sub>3</sub>)
- Figure S6.** <sup>13</sup>C NMR spectrum of compound **6** (100MHz, CDCl<sub>3</sub>)
- Figure S7.** <sup>1</sup>H NMR spectrum of compound **7** (400MHz, CDCl<sub>3</sub>)
- Figure S8.** <sup>13</sup>C NMR spectrum of compound **7** (100MHz, CDCl<sub>3</sub>)
- Figure S9.** <sup>1</sup>H NMR spectrum of compound **8** (400MHz, MeOH)
- Figure S10.** <sup>13</sup>C NMR spectrum of compound **8** (125MHz, CDCl<sub>3</sub>)

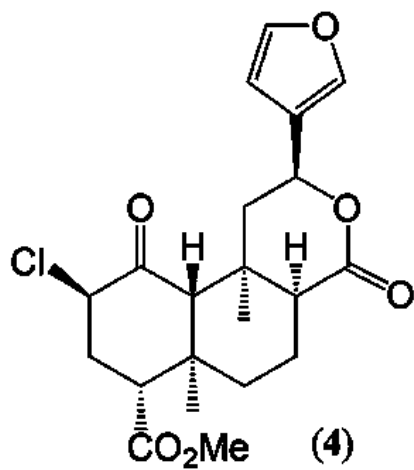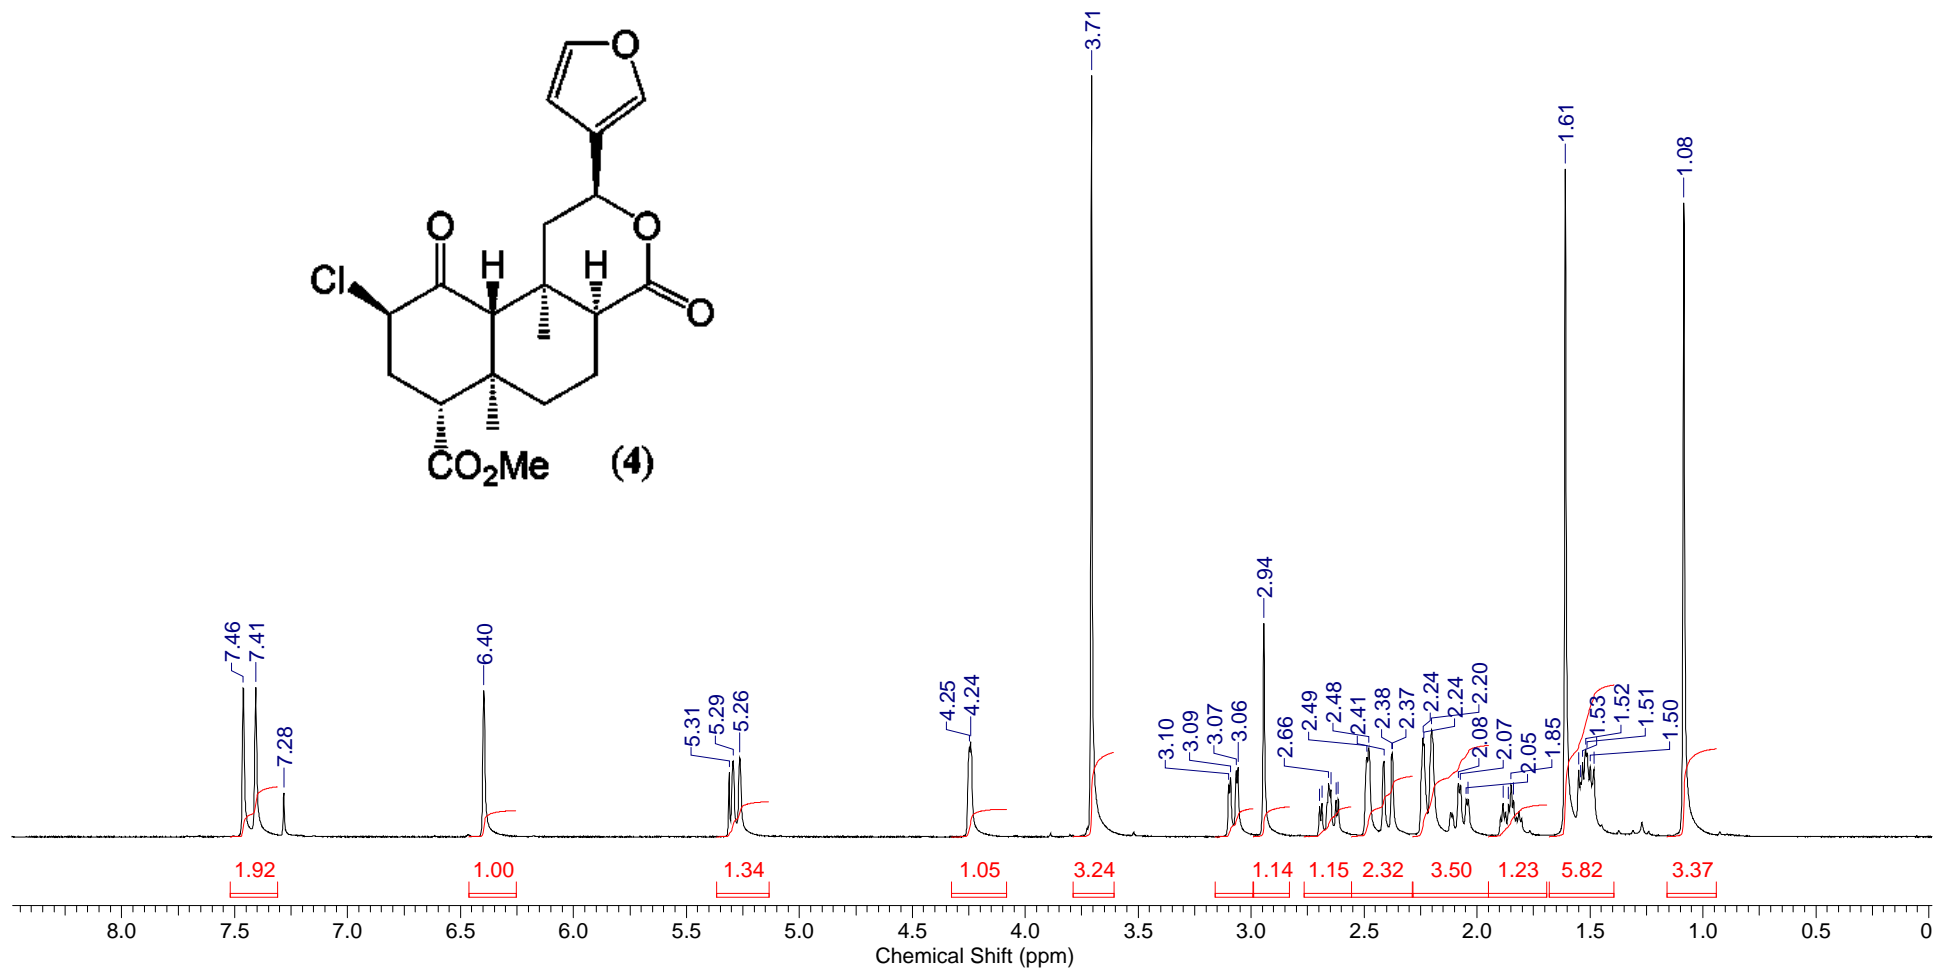

**Figure S1.** <sup>1</sup>H NMR spectrum of compound **4** (400MHz, CDCl<sub>3</sub>)

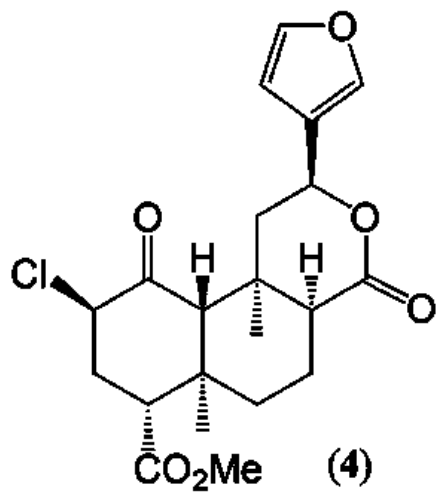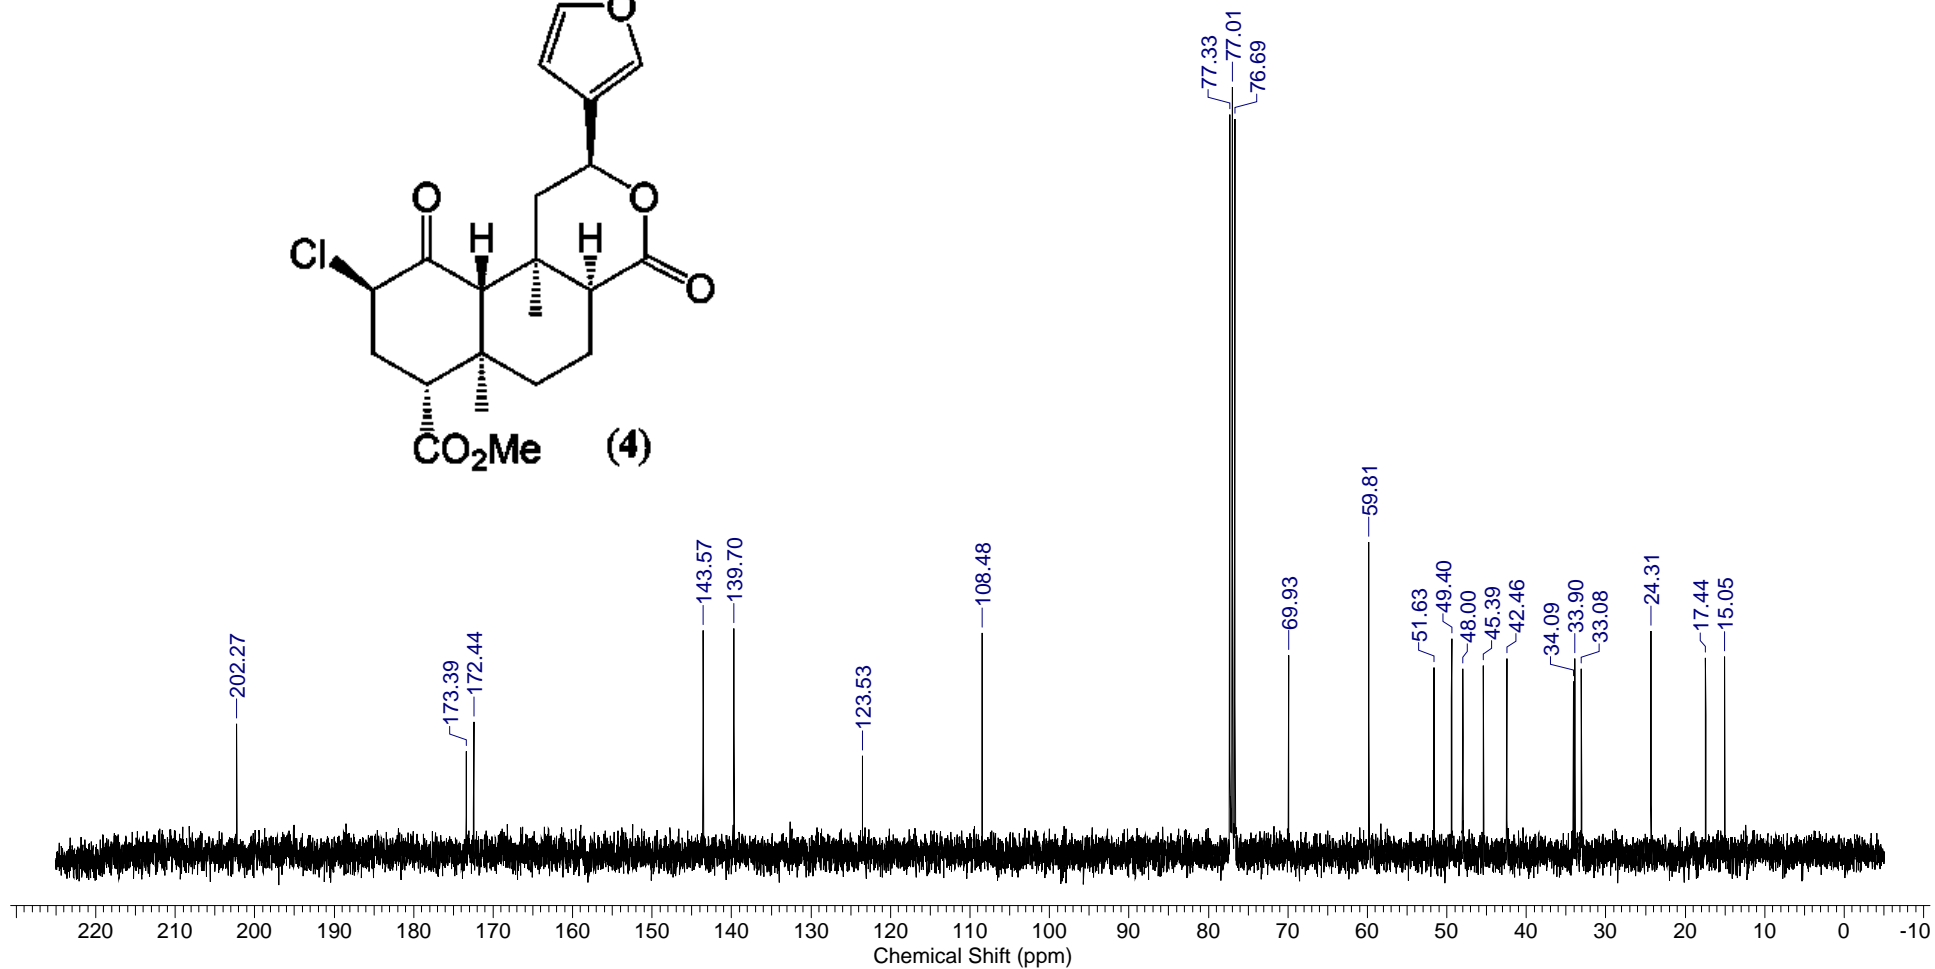

**Figure S2.** <sup>13</sup>C NMR spectrum of compound **4** (100MHz, CDCl<sub>3</sub>)

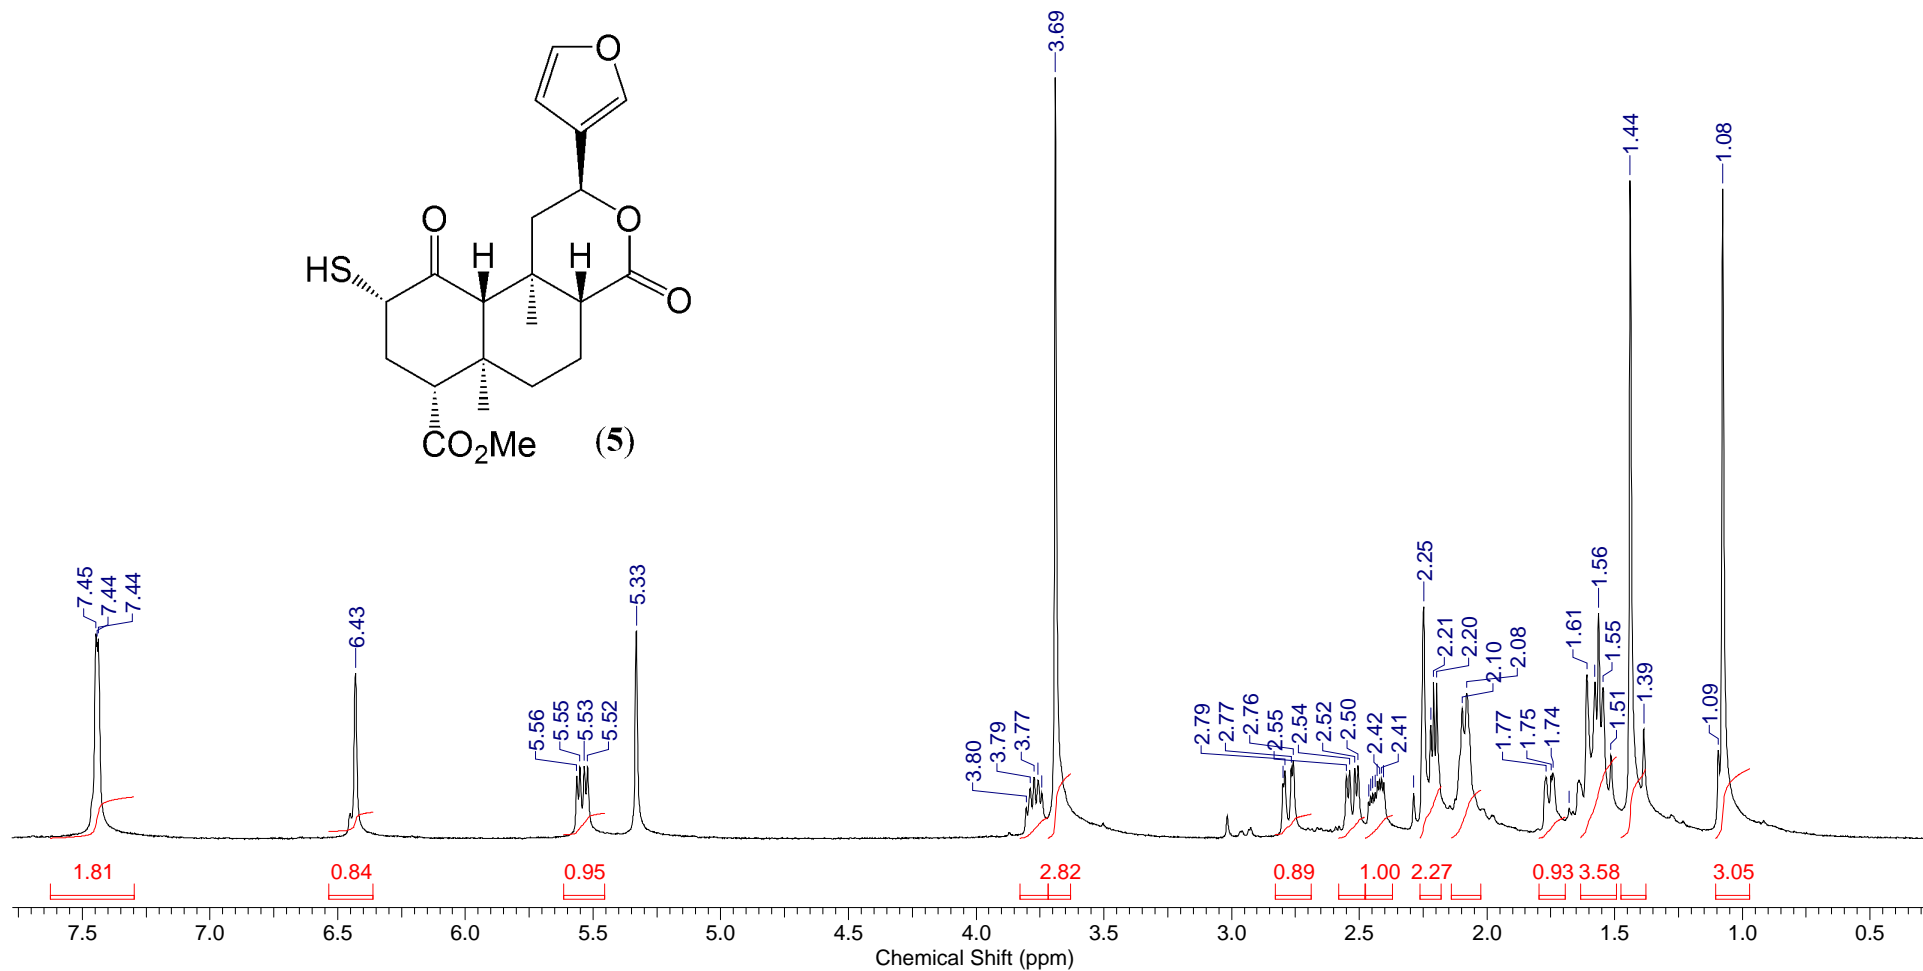

**Figure S3.** <sup>1</sup>H NMR spectrum of compound 5 (400MHz, CD<sub>2</sub>Cl<sub>2</sub>)

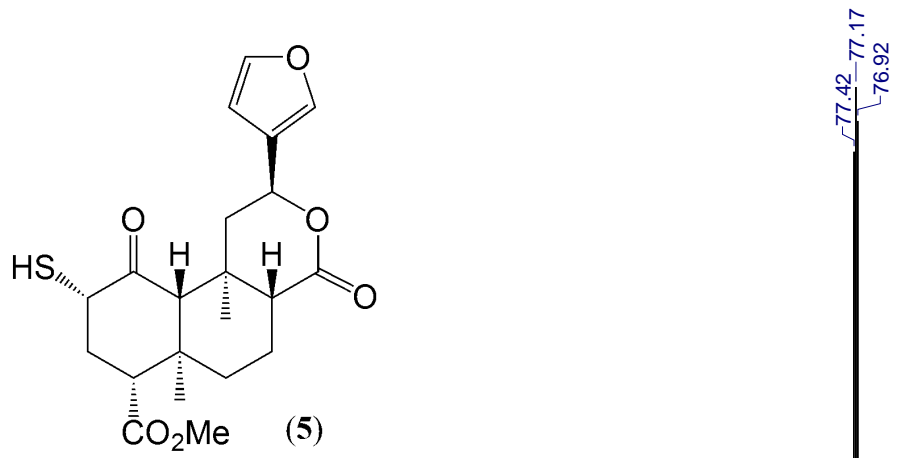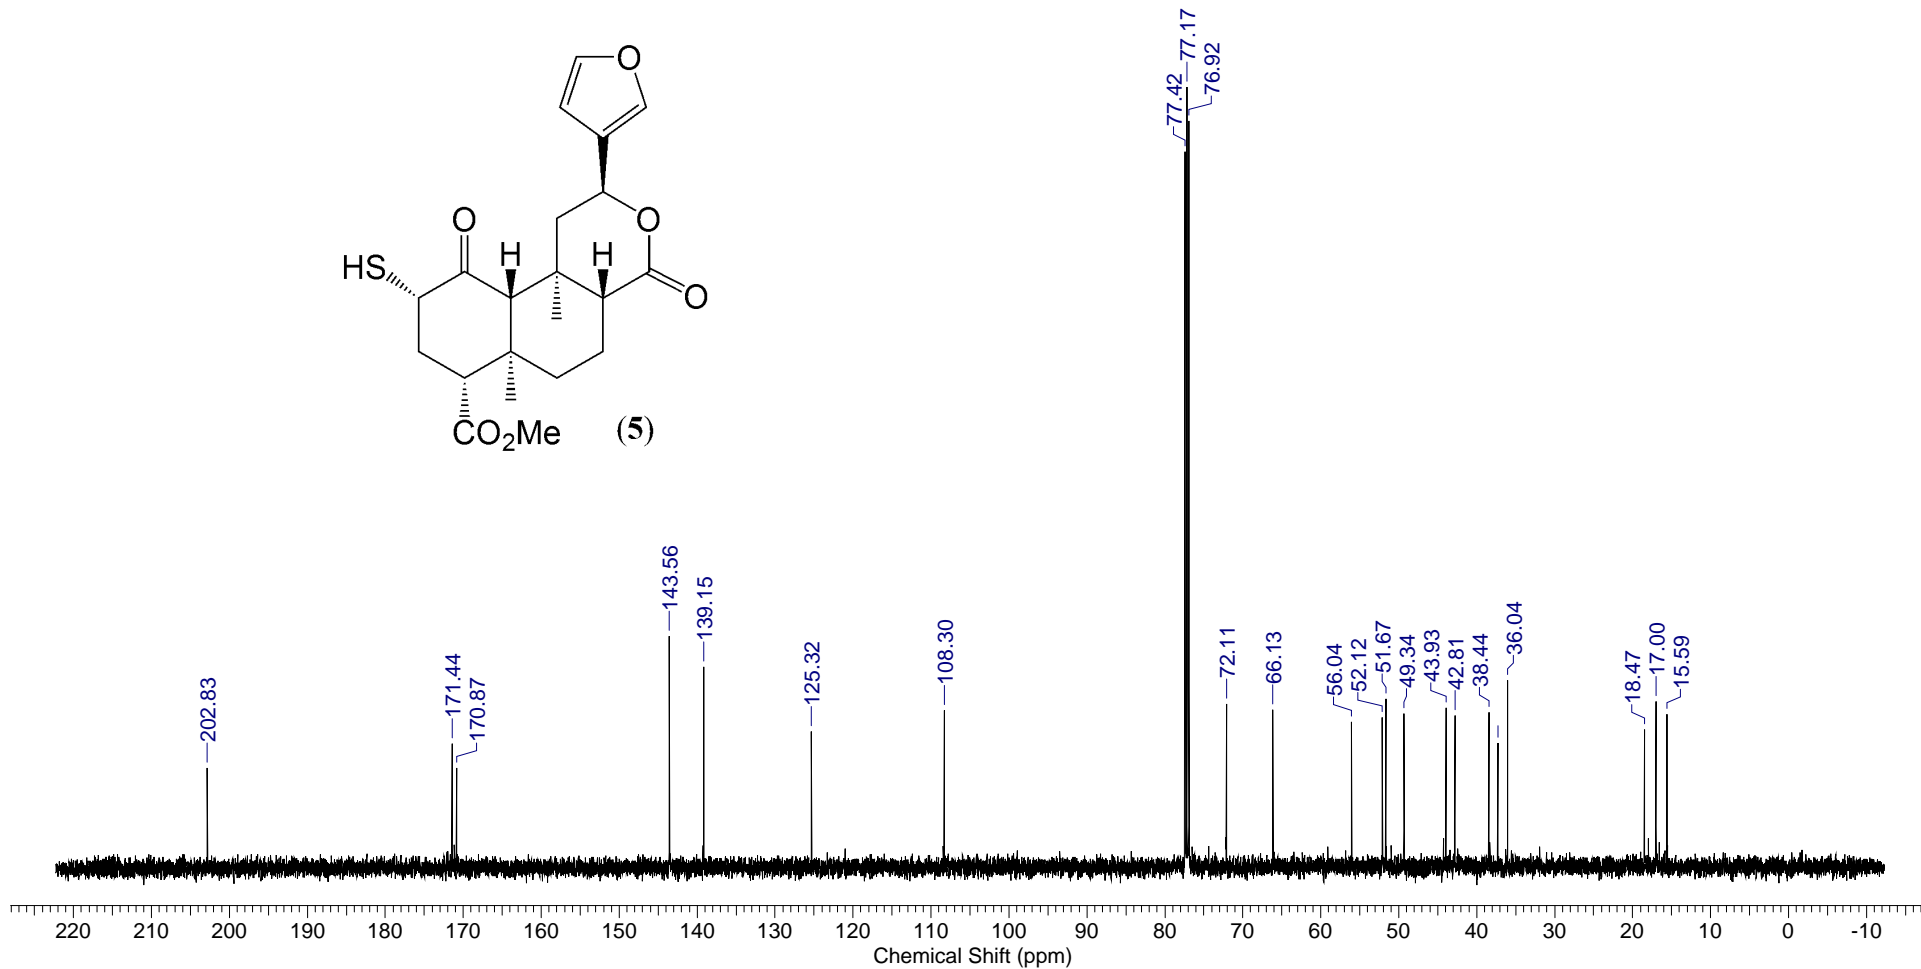

Figure S4. <sup>13</sup>C NMR spectrum of compound 5 (125MHz, CDCl<sub>3</sub>)

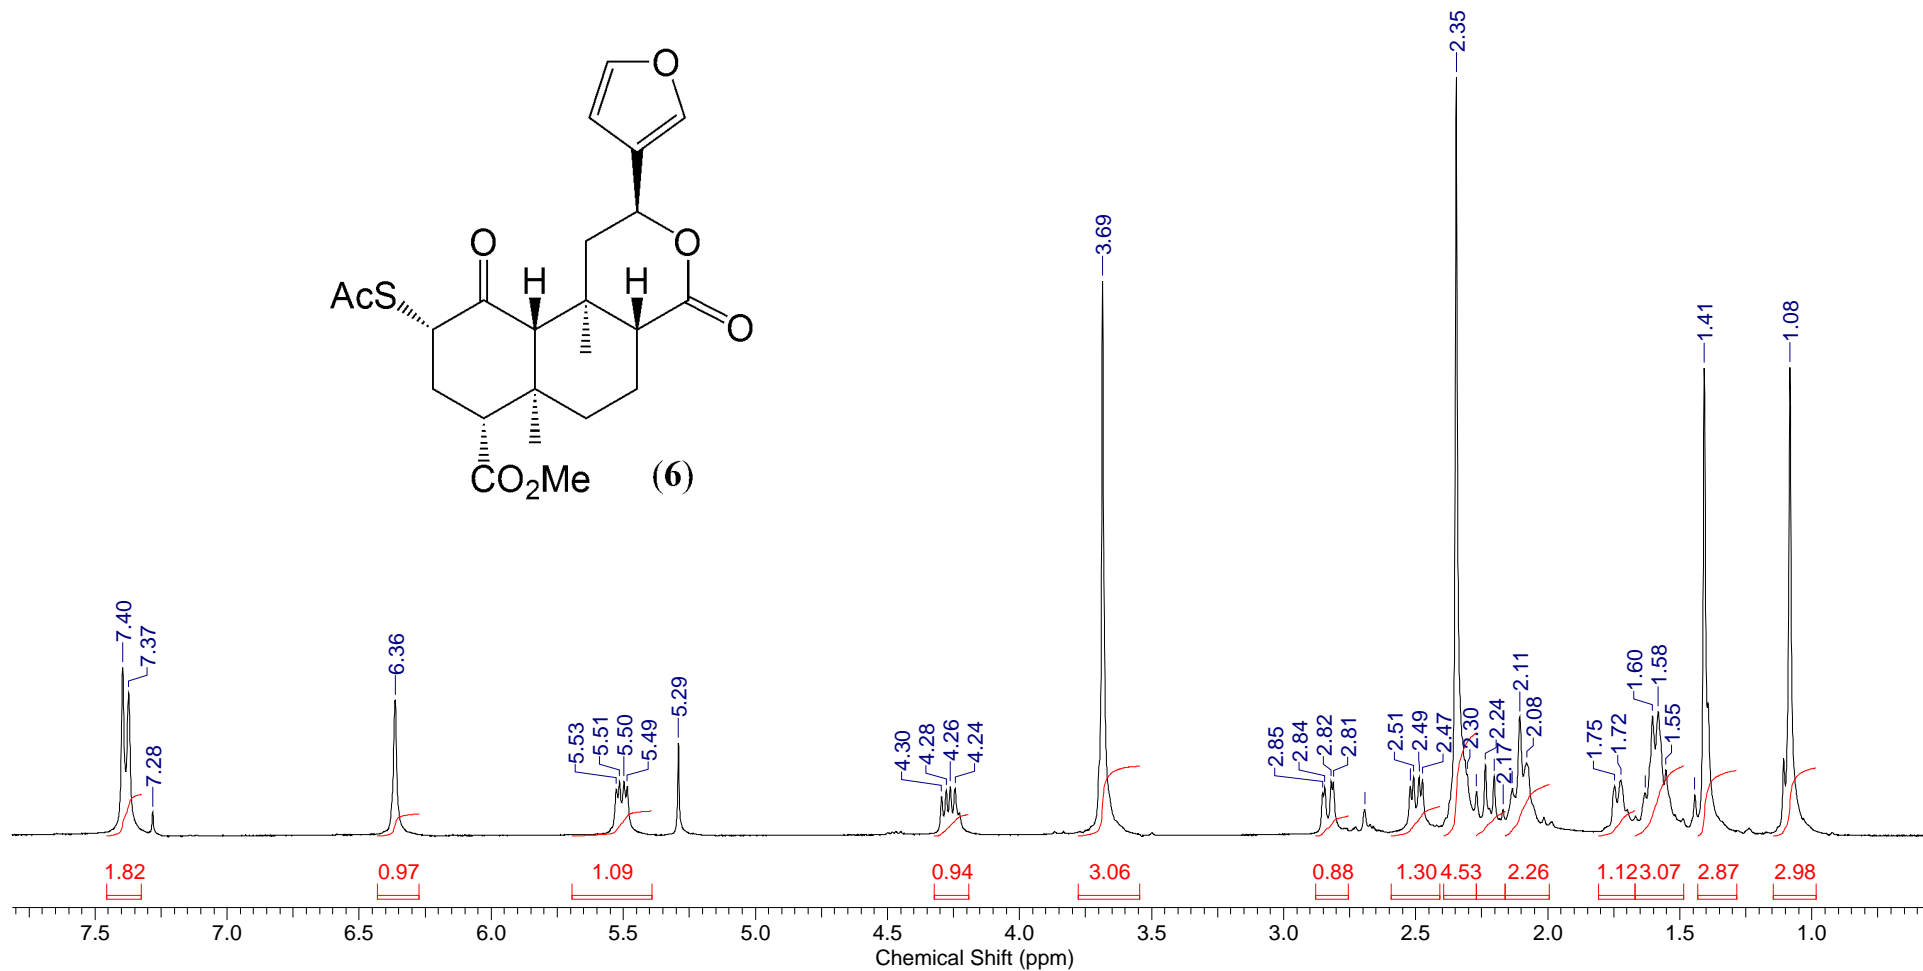

**Figure S5.** <sup>1</sup>H NMR spectrum of compound 6 (400MHz, CDCl<sub>3</sub>)

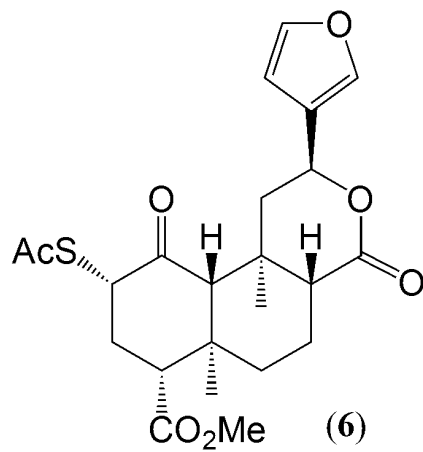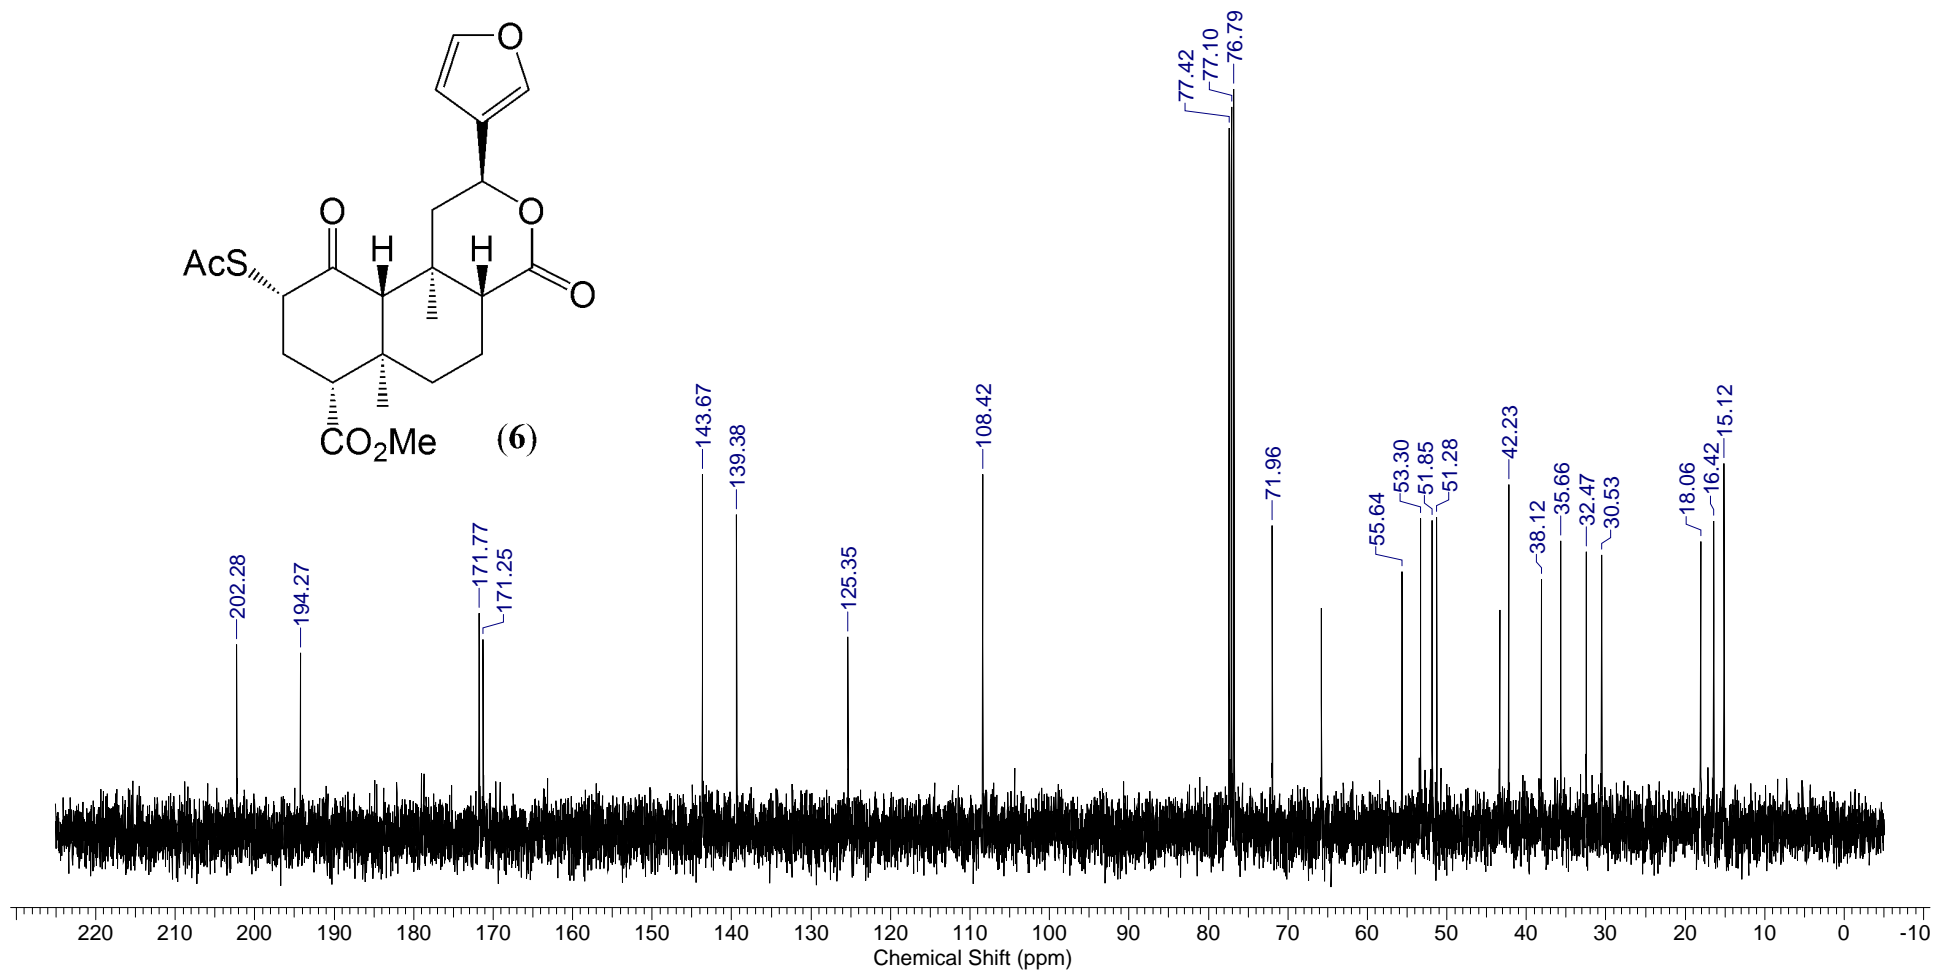

Figure S6.  $^{13}\text{C}$  NMR spectrum of compound 6 (100MHz,  $\text{CDCl}_3$ )

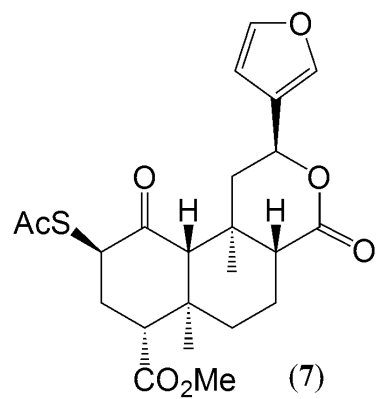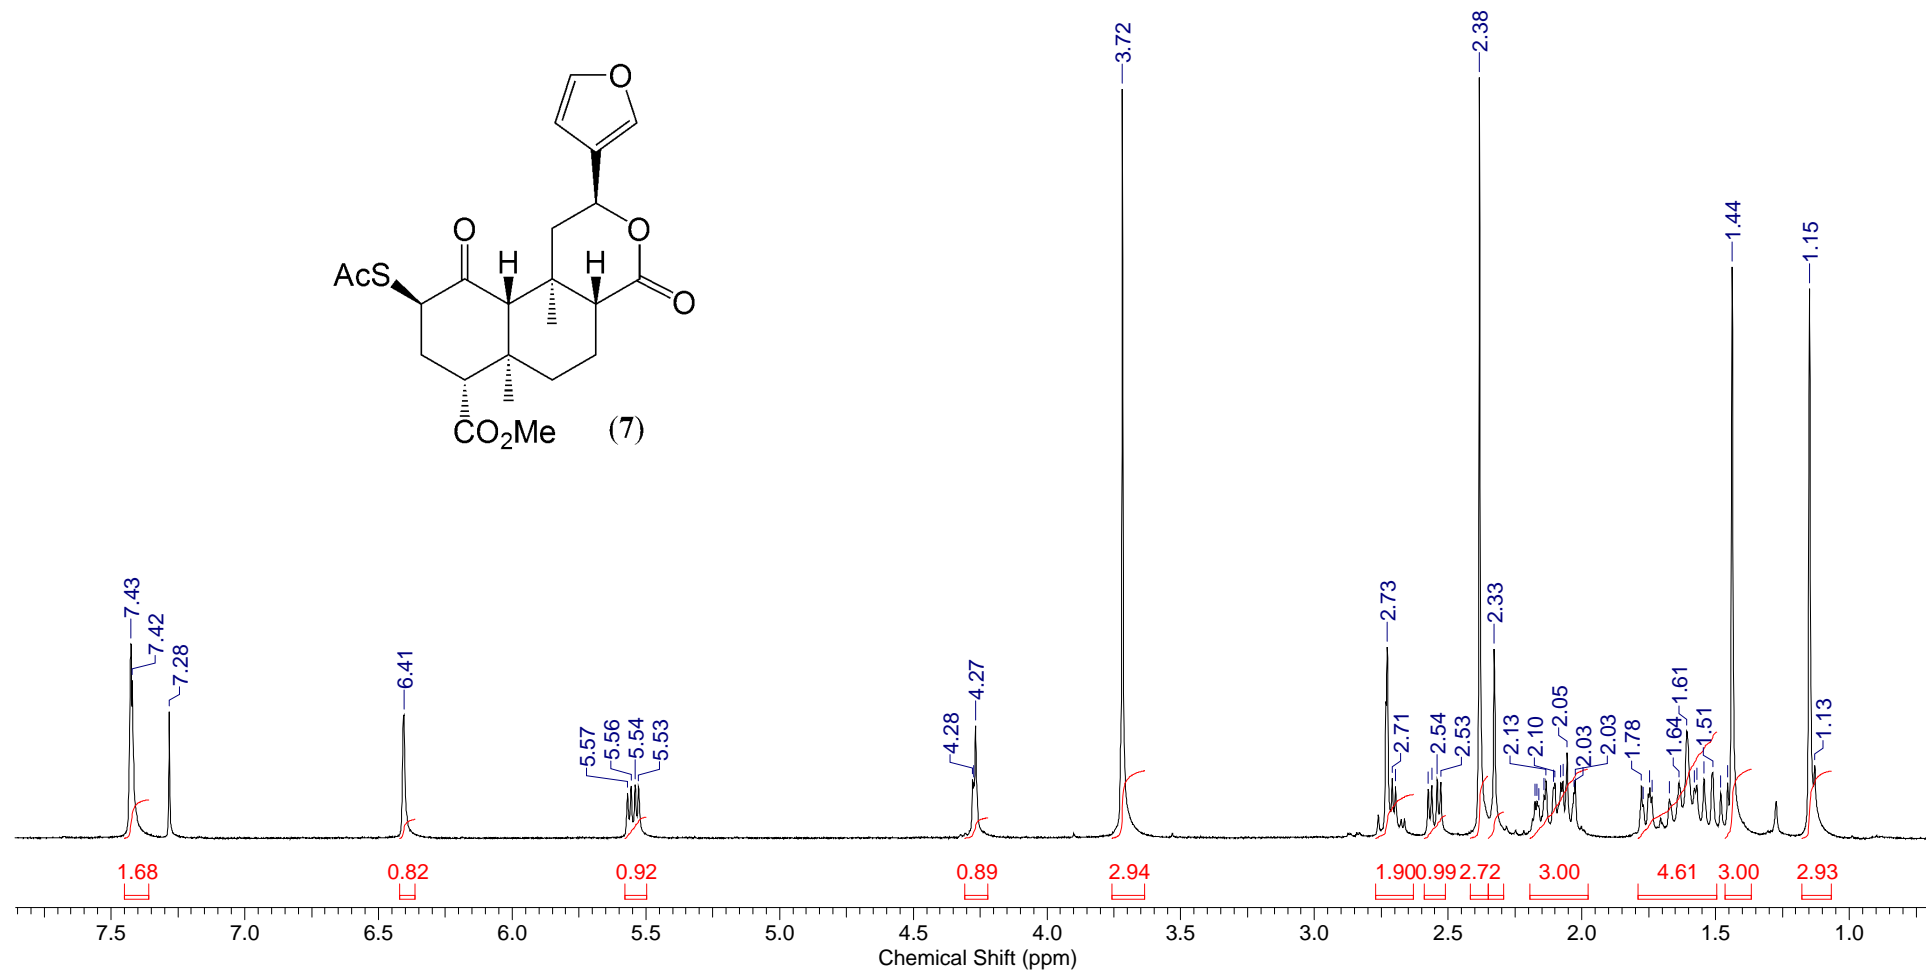

**Figure S7.** <sup>1</sup>H NMR spectrum of compound 7 (400MHz, CDCl<sub>3</sub>)



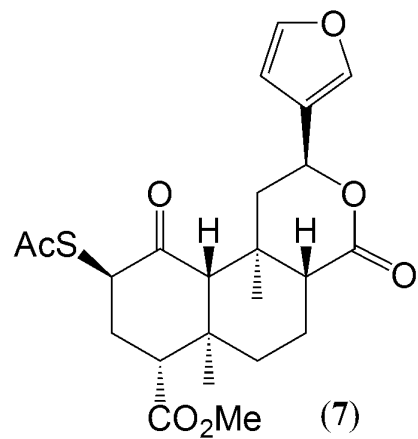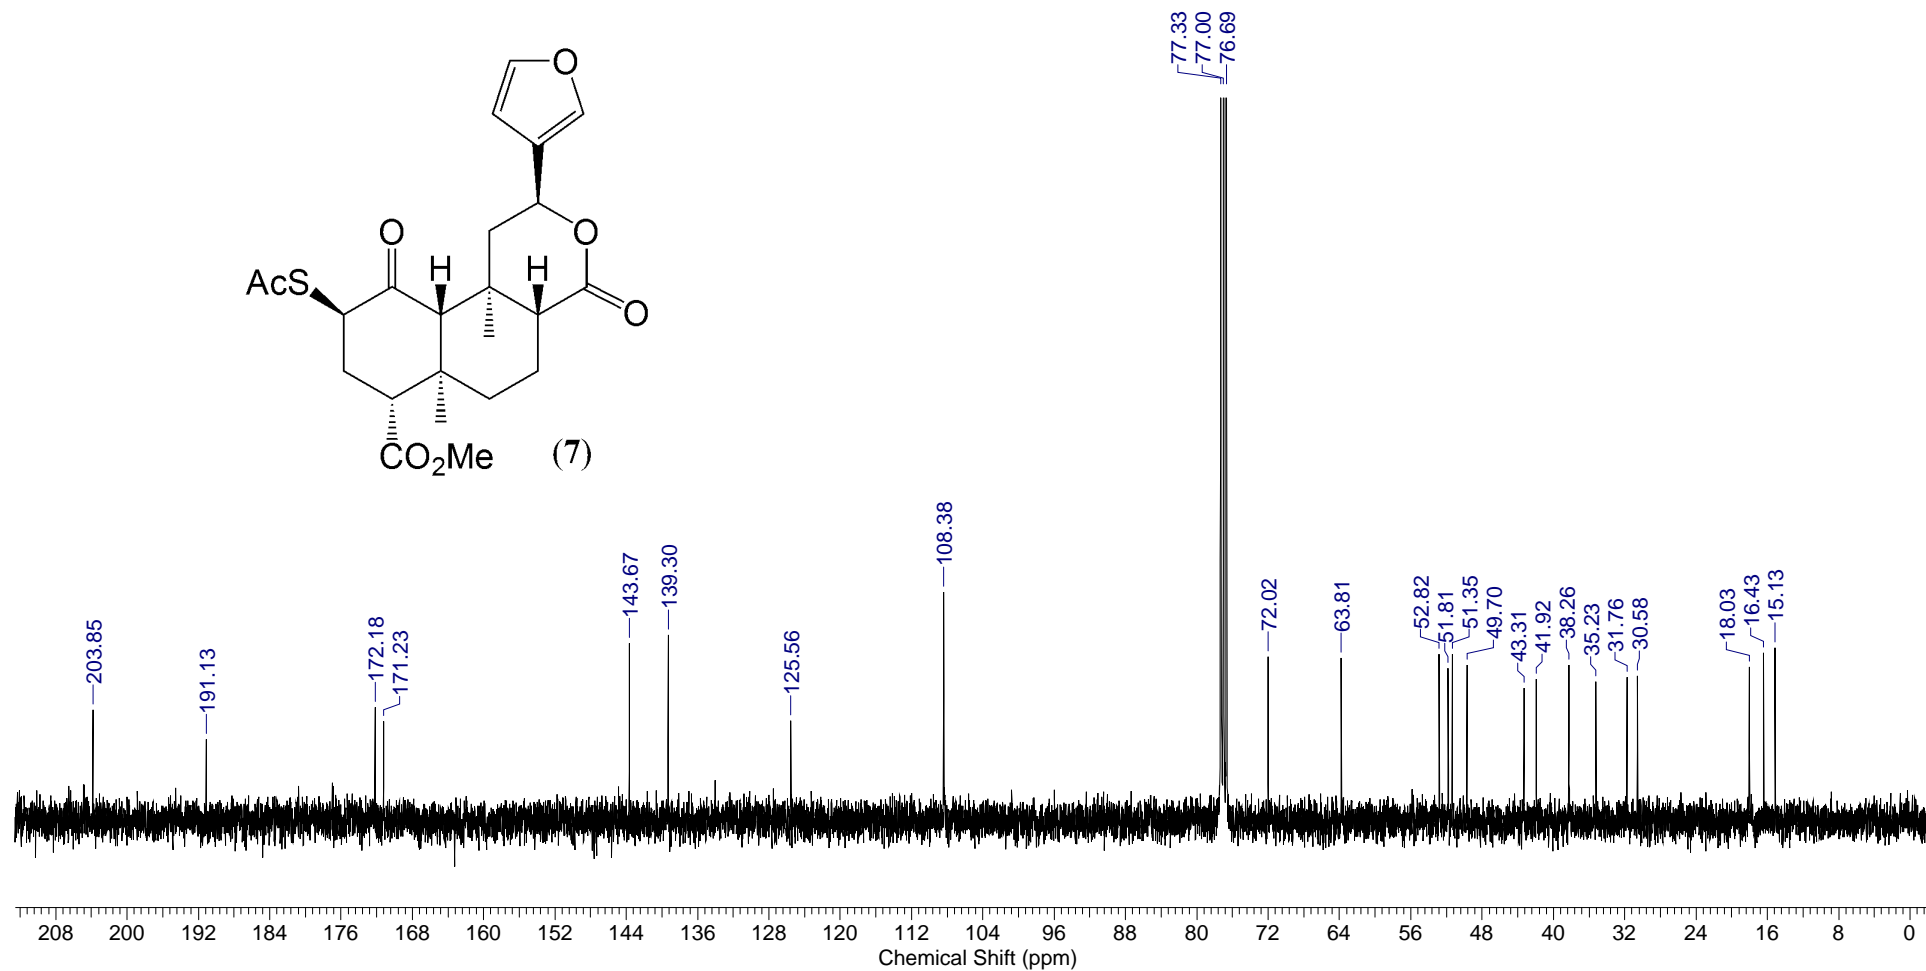

**Figure S8.**  $^{13}\text{C}$  NMR spectrum of compound 7 (100 MHz,  $\text{CDCl}_3$ )

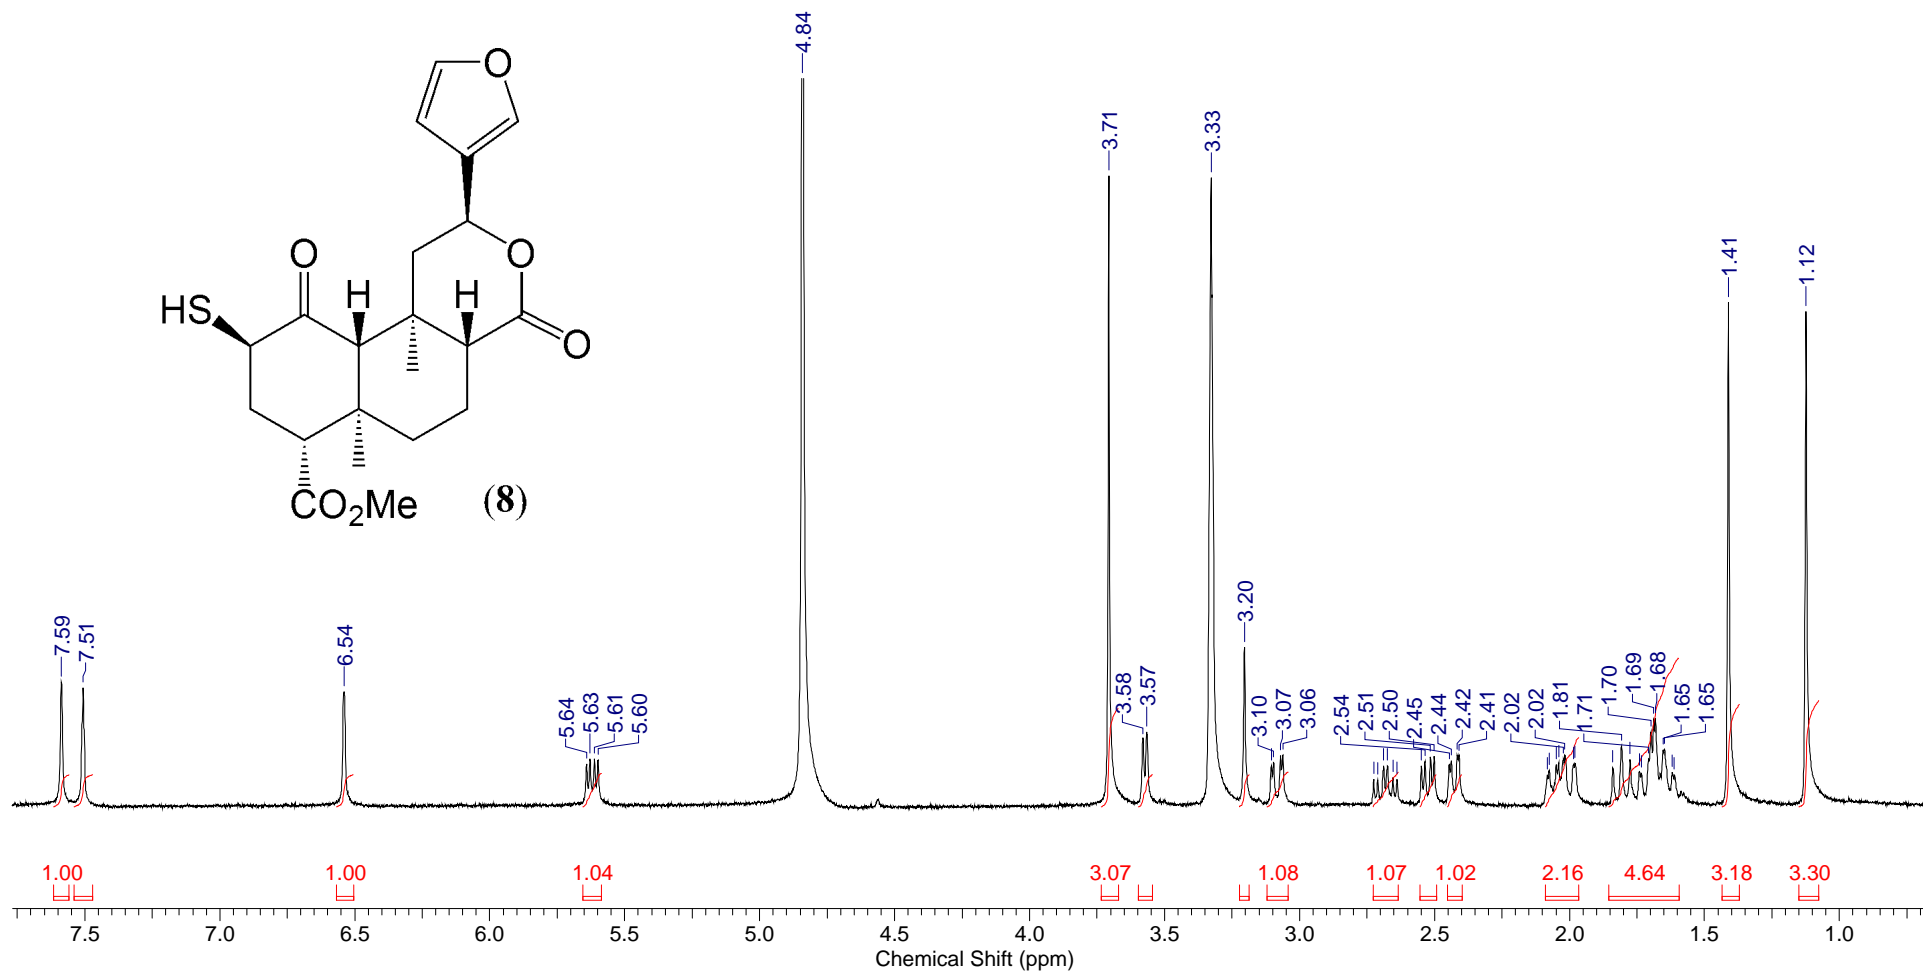

**Figure S9.** <sup>1</sup>H NMR spectrum of compound **8** (400MHz, MeOH)

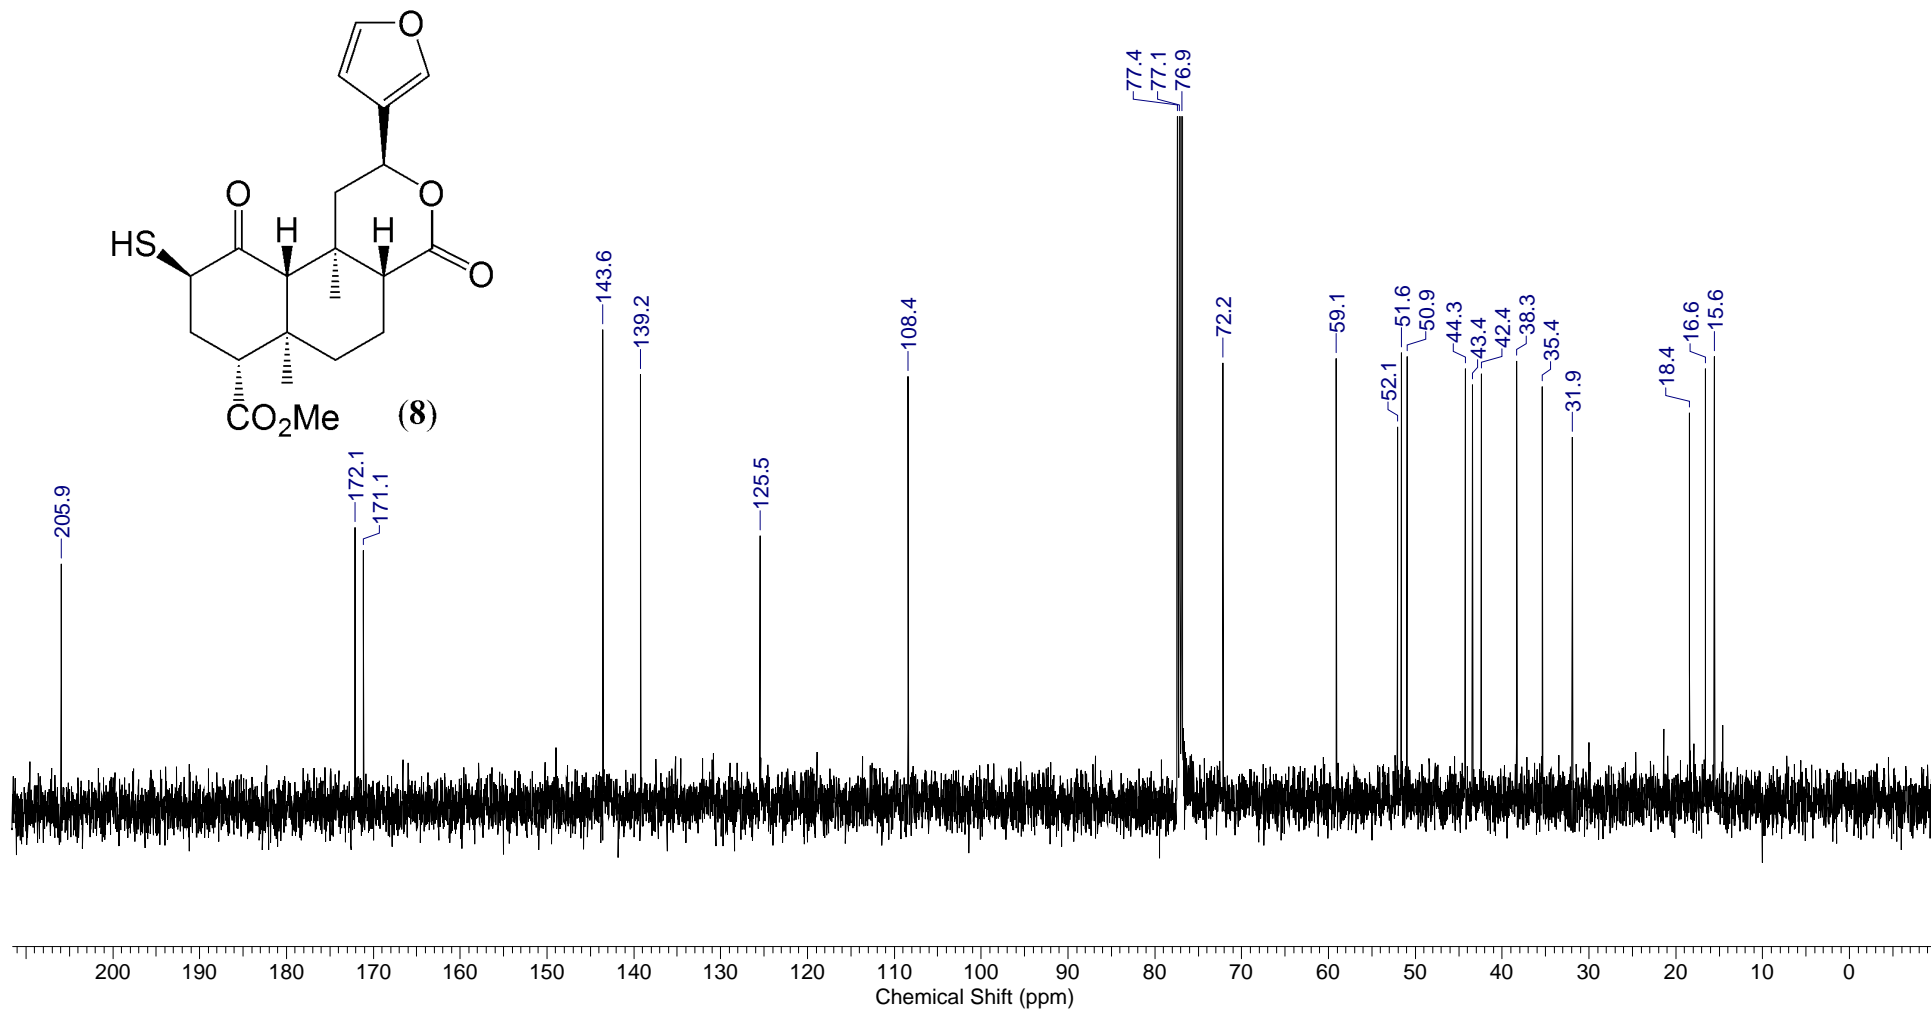

**Figure S10.** <sup>13</sup>C NMR spectrum of compound 8 (125MHz, CDCl<sub>3</sub>)
